# Supplementary material for: New block poly(ether sulfone) based anion exchange membranes with rigid side-chains and high-density quaternary ammonium groups for fuel cell application
Source: Royal Society of Chemistry journal article supplement (doi:10.1039/d2py00588c), 2022-01-01
Supplement: d2py00588c1.pdf [file d2py00588c1.pdf]

## Supplementary information

### **New block poly(ether sulfone)s based anion exchange membranes with rigid side-chain and high-density quaternary ammonium groups for fuel cell application**

Shenghua Du, Shuai Huang, Ning Xie, Tong Zhang, Yaoyao Xu, Xingming Ning, Pei Chen\*,  
Xinbing Chen\*, Zhongwei An

*Key Laboratory of Applied Surface and Colloid Chemistry (MOE); International Joint  
Research Center of Shaanxi Province for Photoelectric Materials Science; Shaanxi Key  
Laboratory for Advanced Energy Devices; Shaanxi Engineering Laboratory for Advanced  
Energy Technology, School of Materials Science and Engineering, Shaanxi Normal University,  
Xi'an 710119, PR China*

### **Materials and reagents**

The FAA-3-solut-10 is an anion exchange ionomer that act as a binder, which is obtained by dissolving FAA-3 in N-methyl-2-pyrrolidone. It is bought from SCI Materials Hub.

### **The sample preparation method**

The copolymers bPES(x/y)-Q (in Br<sup>-</sup> form) was dissolved in DMF to keep the polymer concentration at about 5 wt%. After filtering out insoluble impurities, the filtrate was dropped on mica flake surface, followed by vacuum drying at 60 °C for 48 h, and then AFM measurement was conducted in atmosphere. For TEM image observation, the filtrate was dropped on a carbon coated copper mesh. After dried under vacuum at 30 °C, the sample loaded-copper mesh was immersed in 1 M Na<sub>2</sub>WO<sub>4</sub> aqueous solution for 24 h to adsorb WO<sub>4</sub><sup>2-</sup> by ion-exchange of the Br<sup>-</sup> ions, in order to improve the contrast of TEM images. The excess Na<sub>2</sub>WO<sub>4</sub> was rinsed thoroughly with deionized water, dried in a vacuum oven for 12 h, and then observed by TEM.

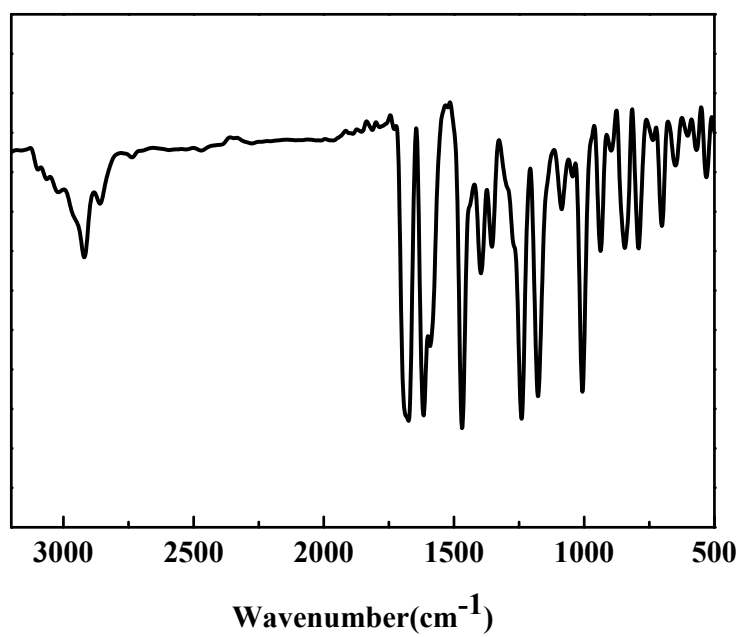

Figure S1. FT-IR spectrum of the monomer DFTED.

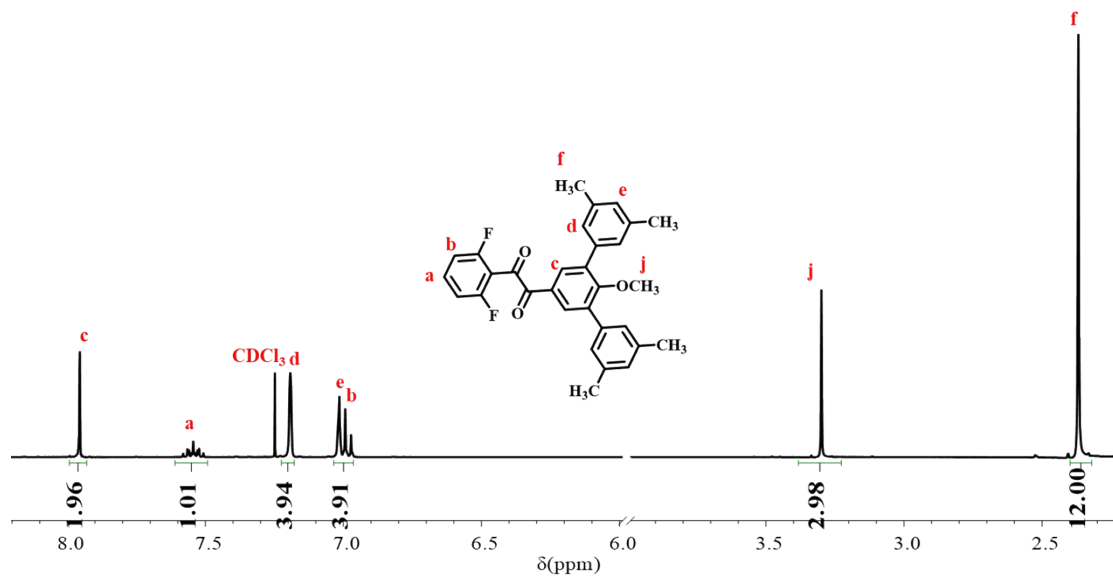

Figure S2. <sup>1</sup>H-NMR spectrum of the monomer DFTED.

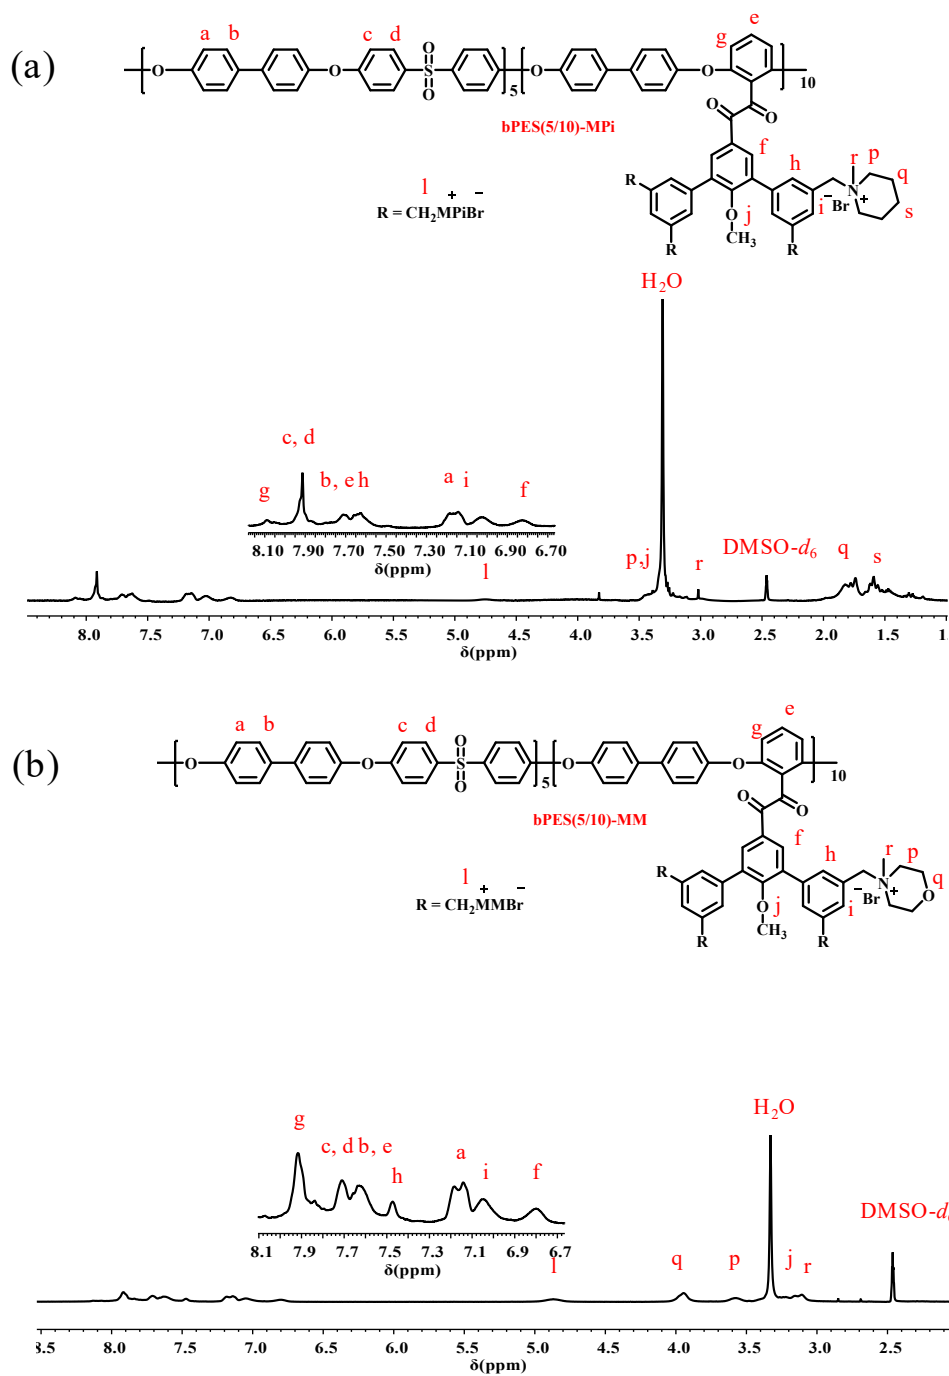

Figure S3.  $^1\text{H-NMR}$  spectrum of the membranes (a) bPES(5/10)-MPi and (b) bPES(5/10)-MM (in  $\text{Br}^-$  form)

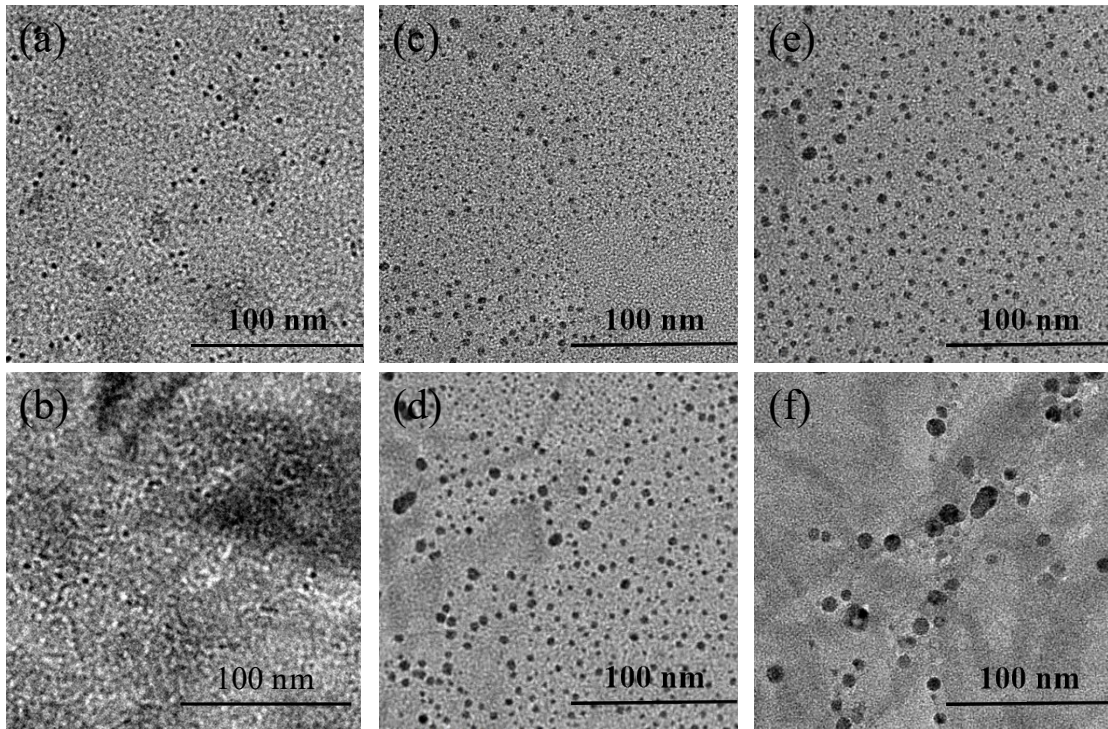

Figure S4. The TEM images the membranes (a) bPES(5/10)-MM, (b) bPES(5/20)-MM, (c) bPES(5/10)-MPi, (d) bPES(5/20)-MPi, (e) bPES(5/10)-MPy, (f) bPES(5/20)-MPy.

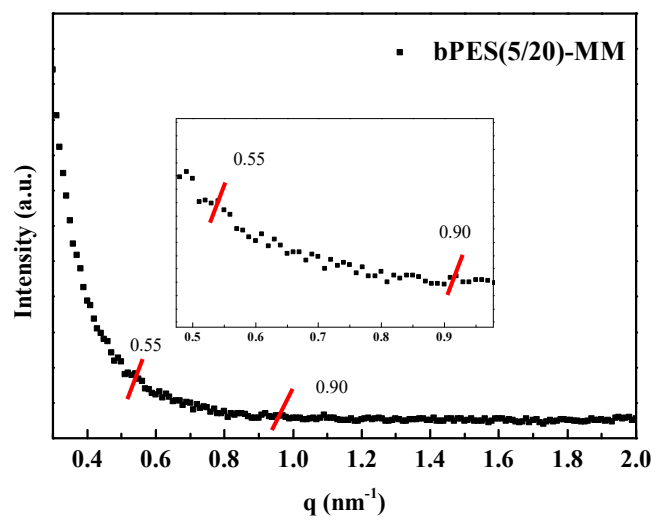

Figure S5. The SAXS spectrum of the membrane bPES(5/20)-MM.

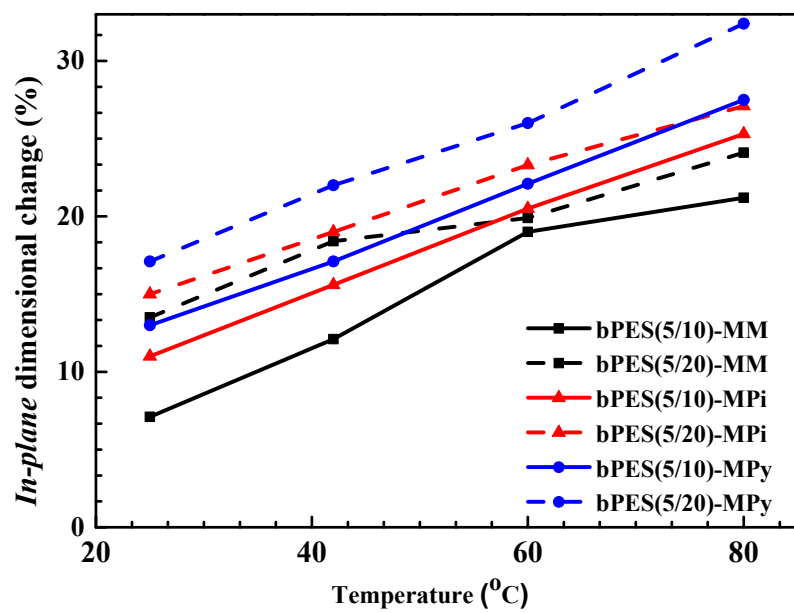

Figure S6. Temperature dependence of in-plane dimensional change of the membranes

bPES(x/y)-Q.



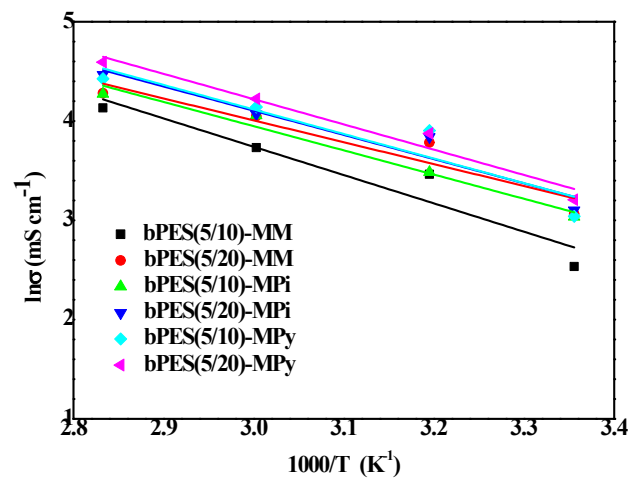

Figure S7. the Arrhenius plots of the membranes bPES(x/y)-Q.

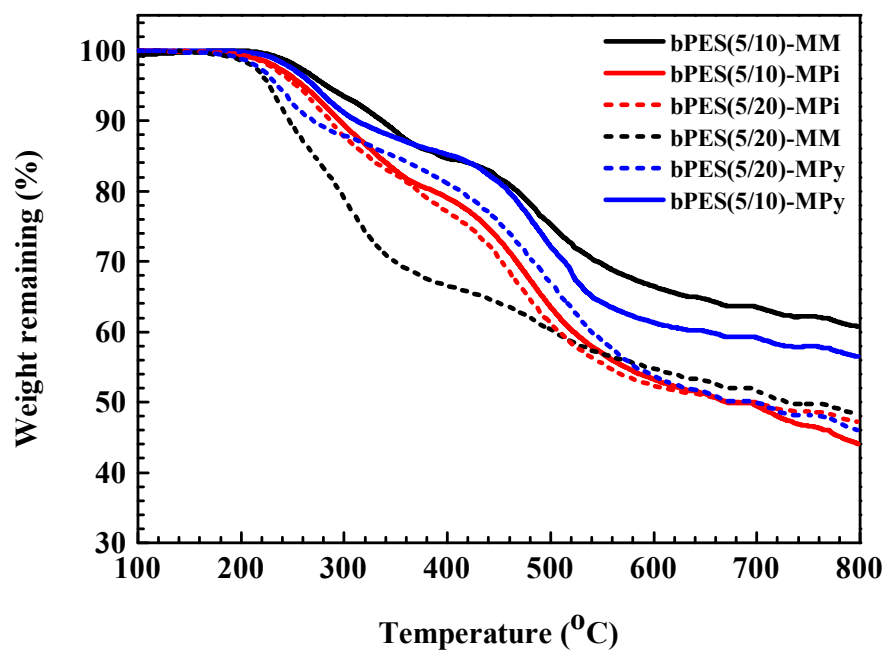

Figure S8. The TGA curves of the membranes bPES(x/y)-Q.

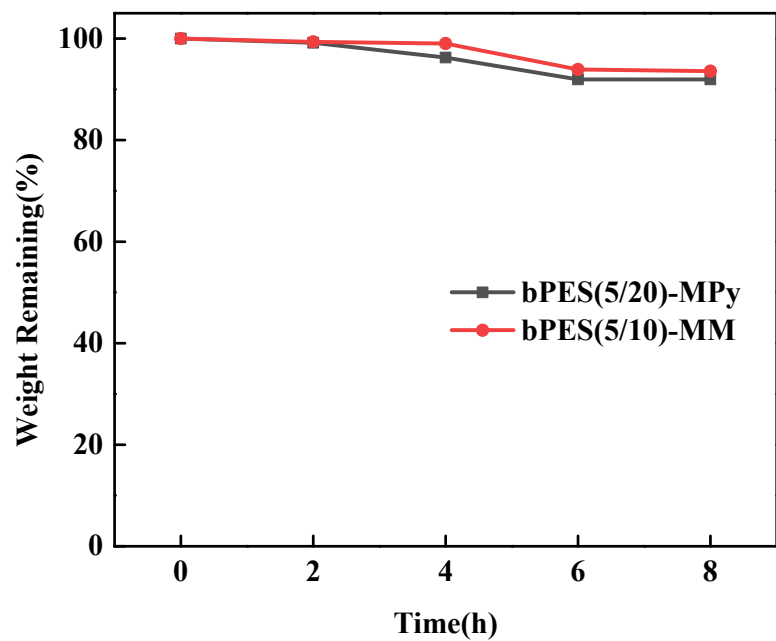

Figure S9. Time dependence of the weight for the membranes bPES(5/20)-MPy and bPES(5/10)-MM aging in Fenton' reagent at 80 °C.

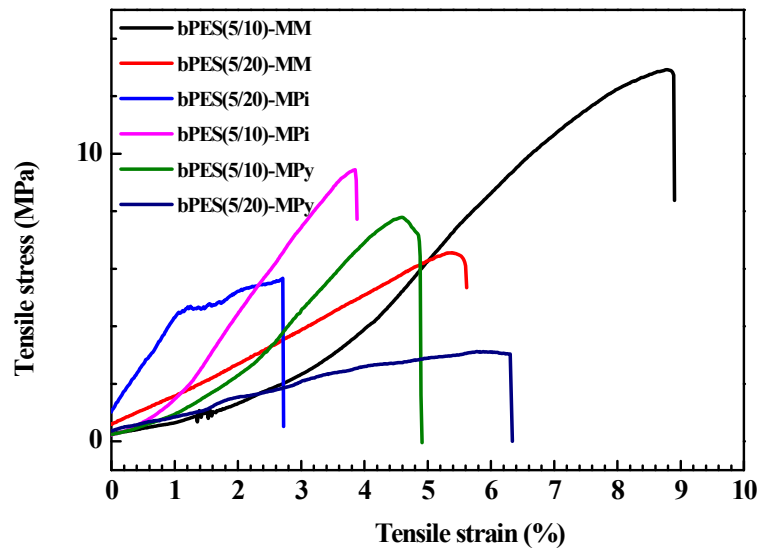

Figure S10. The mechanical properties of the AEMs.
